# Supplementary material for: Development of a Low-Cost UV-Vis Spectrophotometer and Its Application for the Detection of Mercuric Ions Assisted by Chemosensors
Source: PubMed Central journal article supplement (PMC7038951; doi:10.3390/s20030906), 2020-02-08
Supplement: sensors-20-00906-s001.pdf [file sensors-20-00906-s001.pdf]

## Supporting data

# Development of a Low-Cost UV-Vis Spectrophotometer and its Application for the Detection of Mercuric Ions Assisted by Chemosensors

David González-Morales <sup>1</sup>, Asmilly Valencia <sup>2</sup>, Astrid Díaz-Nuñez <sup>3</sup>, Marcial Fuentes-Estrada <sup>4</sup>, Oswaldo López-Santos <sup>1,\*</sup> and Olimpo García-Beltrán <sup>4,\*</sup>

<sup>1</sup> Facultad de Ingeniería, Universidad de Ibagué, Carrera 22 Calle 67, Ibagué 730002, Colombia; david.gonzalez@unibague.edu.co

<sup>2</sup> Facultad de Ingeniería Forestal, Universidad del Tolima, Altos de Santa Helena, Ibagué 730001, Colombia; ayvalencial@ut.edu.co

<sup>3</sup> Universidad Nacional de Colombia, Sede Medellín, Escuela de Química, Carrera 65, No. 59A-110, Medellín, Colombia; asdiazn@unal.edu.co

<sup>4</sup> Facultad de Ciencias Naturales y Matemáticas, Universidad de Ibagué, Carrera 22 Calle 67, Ibagué 730002, Colombia; marcial.fuentes@unibague.edu.co

\* Correspondence: jose.garcia@unibague.edu.co (O.G.-B.); oswaldo.lopez@unibague.edu.co (O.L.-S.); Tel.: +57-8-2760010

## Table of contents

| Contents                                                                                                                                                                       | Page |
|--------------------------------------------------------------------------------------------------------------------------------------------------------------------------------|------|
| <b>Figure S1.</b> a) 1W used white LED. b) 5° collimator lens.                                                                                                                 | S3   |
| <b>Figure S2.</b> a4988 driver in microstepping configuration.                                                                                                                 | S3   |
| <b>Scheme S1.</b> Synthetic route to 7-(diethylamino)-2-chromene-2-thione ( <b>3</b> )                                                                                         | S4   |
| <b>Figure S3.</b> <sup>1</sup> H NMR (DMSO- <i>d</i> <sub>6</sub> ) spectrum of 7-(diethylamino)-2H-chromen-2-one ( <b>2</b> )                                                 | S5   |
| <b>Figure S4.</b> <sup>13</sup> C NMR (DMSO- <i>d</i> <sub>6</sub> ) spectrum of 7-(diethylamino)-2H-chromen-2-one ( <b>2</b> ).                                               | S6   |
| <b>Figure S5.</b> <sup>1</sup> H NMR (DMSO- <i>d</i> <sub>6</sub> ) spectrum of 7-(diethylamino)-2H-chromene-2-thione ( <b>3</b> ).                                            | S7   |
| <b>Figure S6.</b> <sup>13</sup> C NMR (DMSO- <i>d</i> <sub>6</sub> ) spectrum of 7-(diethylamino)-2H-chromene-2-thione ( <b>3</b> ).                                           | S8   |
| <b>Figure S7.</b> HRMS of 7-(diethylamino)-2H-chromene-2-thione ( <b>3</b> )                                                                                                   | S9   |
| <b>Figure S8.</b> UV-Vis and emission spectra of <b>3</b> .                                                                                                                    | S10  |
| <b>Figure S9.</b> (A) UV-Vis spectra of <b>3</b> at different concentration; (B) Plot of absorbance of chemosensor <b>3</b> against its concentration from <b>3</b> to 30 μM.  | S11  |
| <b>Figure S10.</b> (A) UV-Vis spectra of <b>3</b> at different concentration; (B) Plot of absorbance of chemosensor <b>3</b> against its concentration from <b>3</b> to 30 μM. | S12  |
| <b>Figure S11.</b> <sup>13</sup> C NMR (DMSO- <i>d</i> <sub>6</sub> ) spectrum of chemosensor <b>3</b> alone (A) and in the presence of mercuric ions (B).                     | S13  |

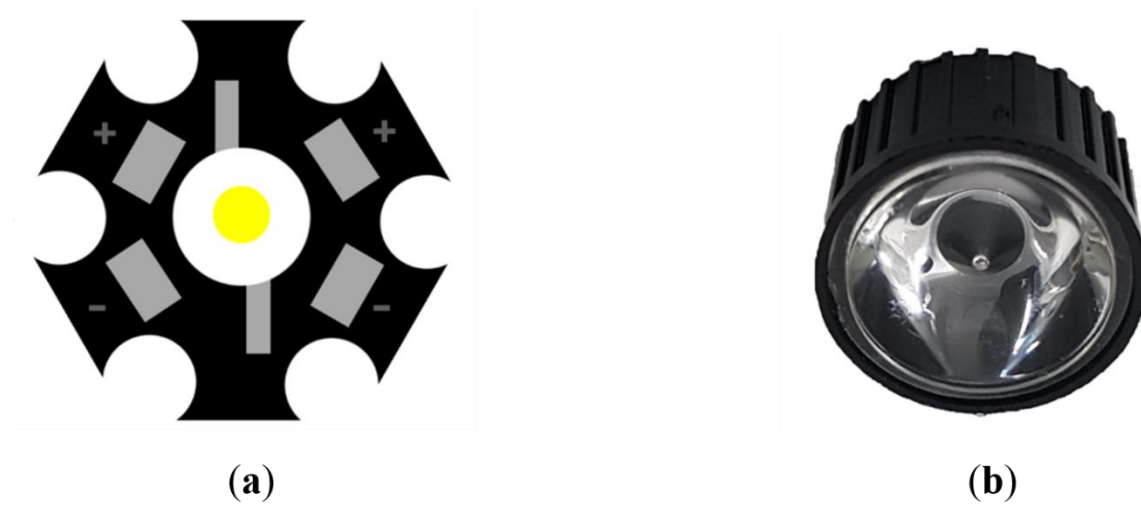

Figure 1. a) 1W used white LED. b) 5° collimator lens.

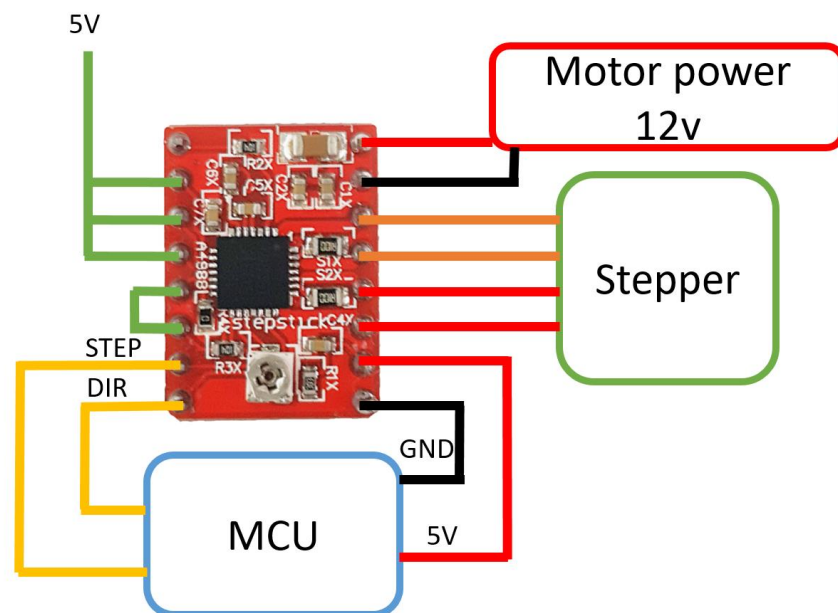

Figure S2. a4988 driver in microstepping configuration.

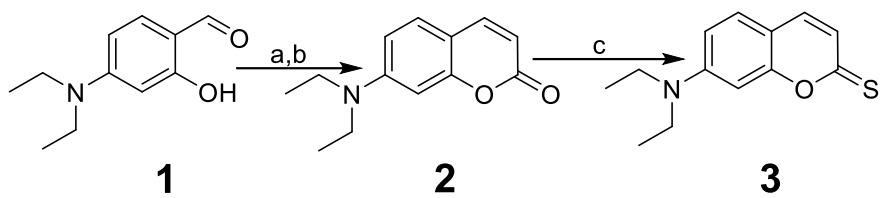

**Scheme S1.** Synthetic route to 7-(diethylamino)-2-chromene-2-thione (**3**). Reagents and conditions: a) Diethyl malonate, piperidine, reflux, 6h; b) HCl, AcOH, reflux, 24 h; c) Lawesson Reagent, Toluene, Reflux, 3 h.

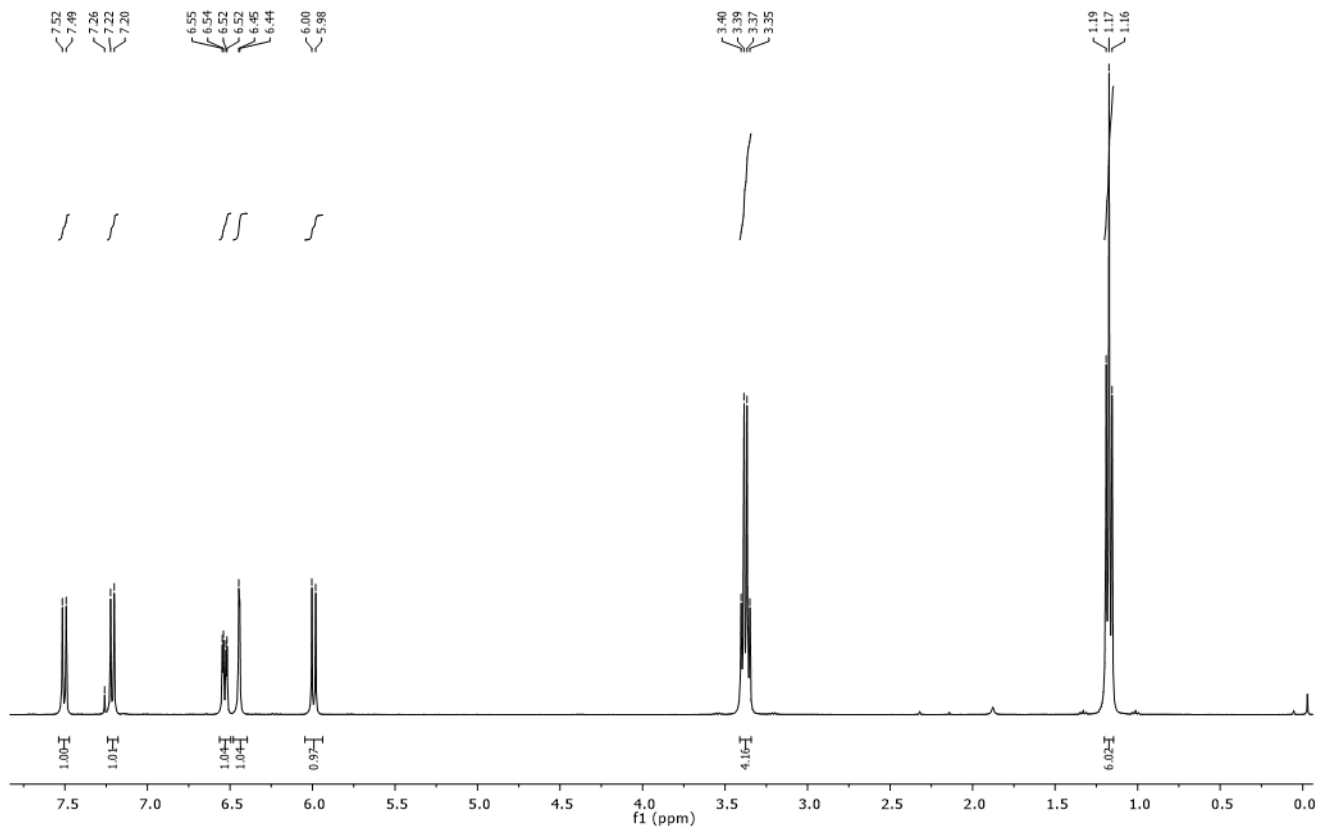

**Figure S3.**  $^1\text{H}$  NMR ( $\text{DMSO-}d_6$ ) spectrum of 7-(diethylamino)-2H-chromen-2-one (2).

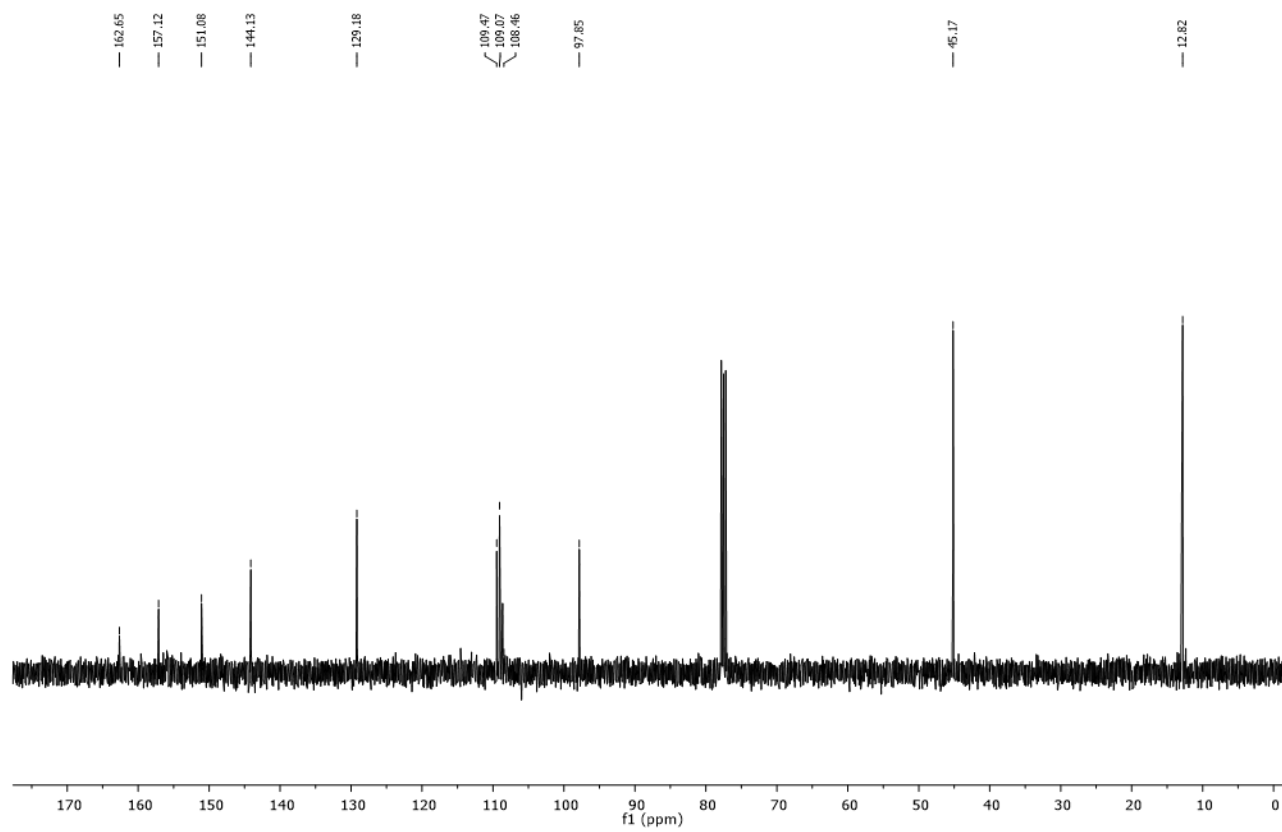

**Figure S4.**  $^{13}\text{C}$  NMR ( $\text{DMSO-}d_6$ ) spectrum of 7-(diethylamino)-2*H*-chromen-2-one (**2**).

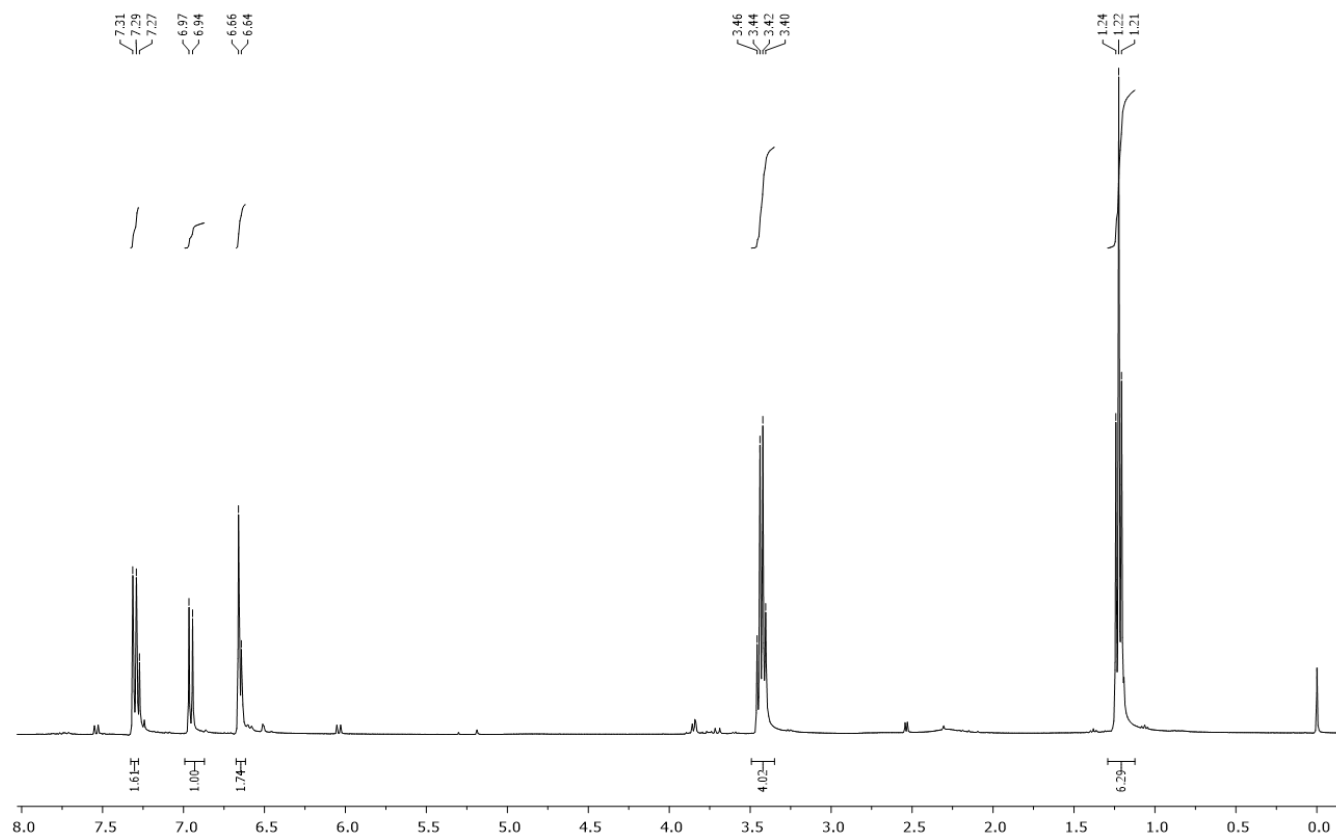

Figure S5.  $^1\text{H}$  NMR ( $\text{DMSO-}d_6$ ) spectrum of 7-(diethylamino)-2H-chromene-2-thione (**3**).

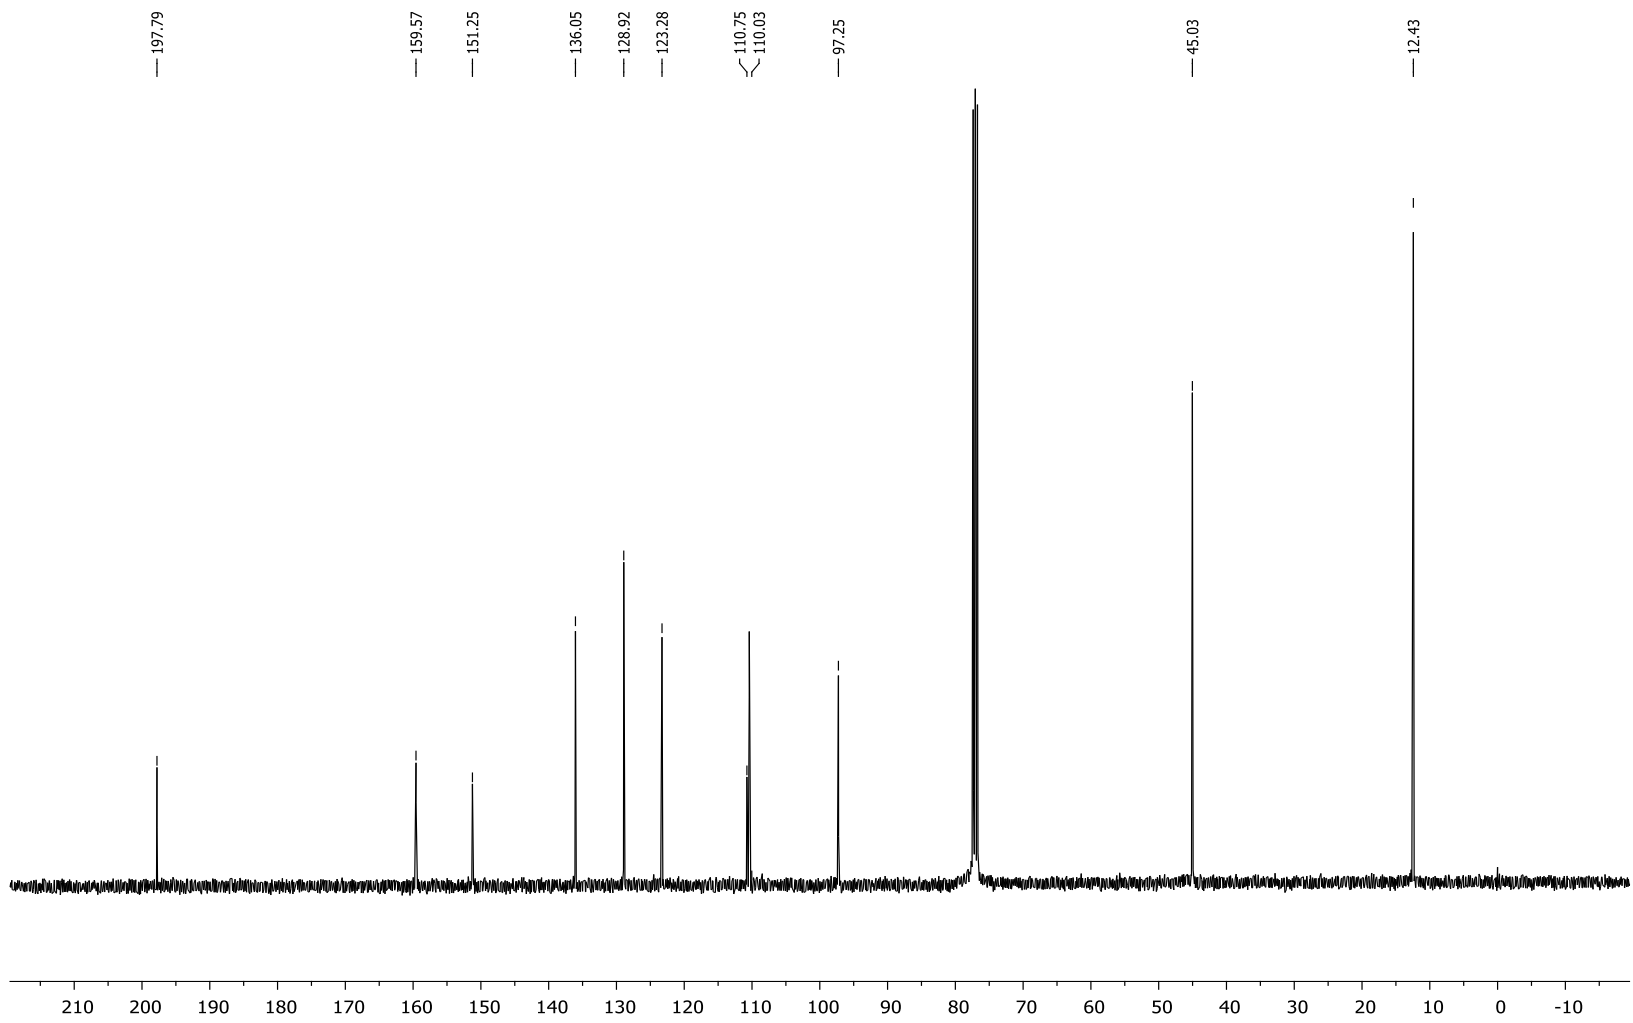

**Figure S6.**  $^{13}\text{C}$  NMR (DMSO- $d_6$ ) spectrum of 7-(diethylamino)-2H-cromeno-2-tiona (3).



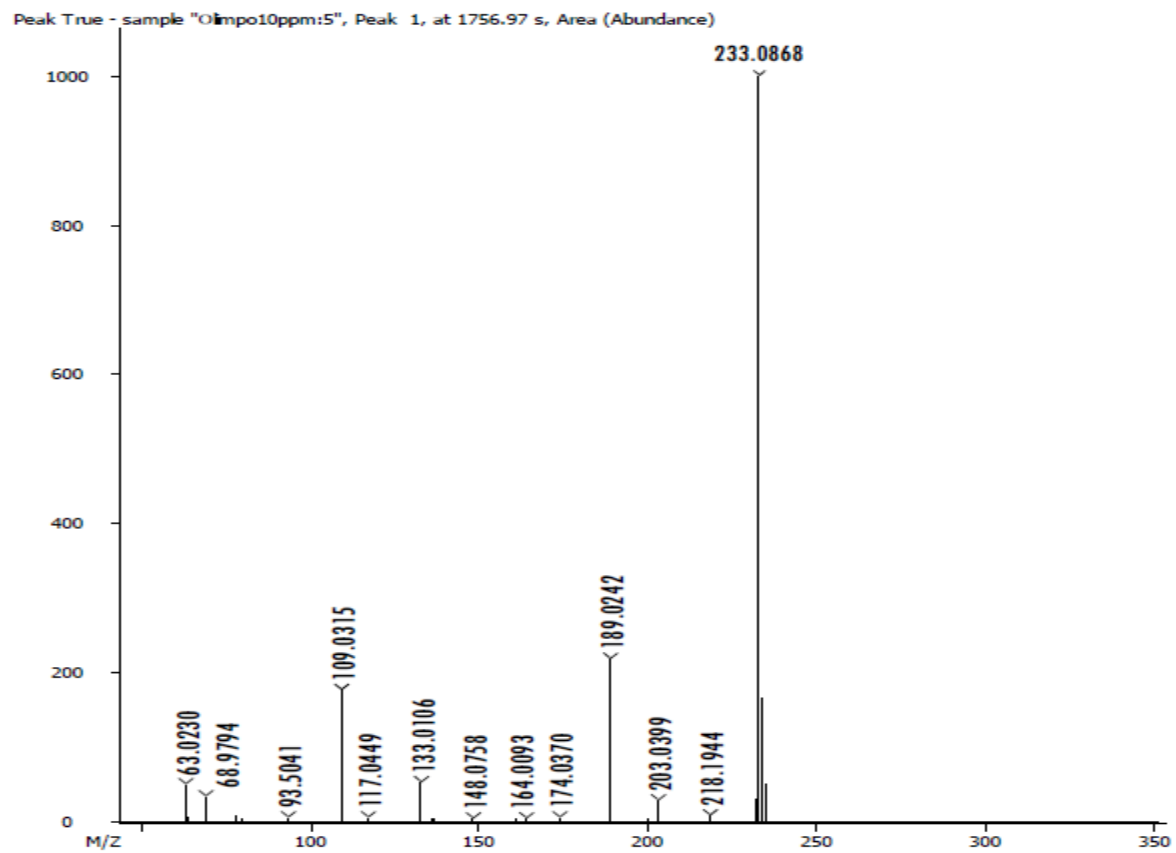

Figure S7. HRMS of 7-(diethylamino)-2H-cromeno-2-tiona (3).

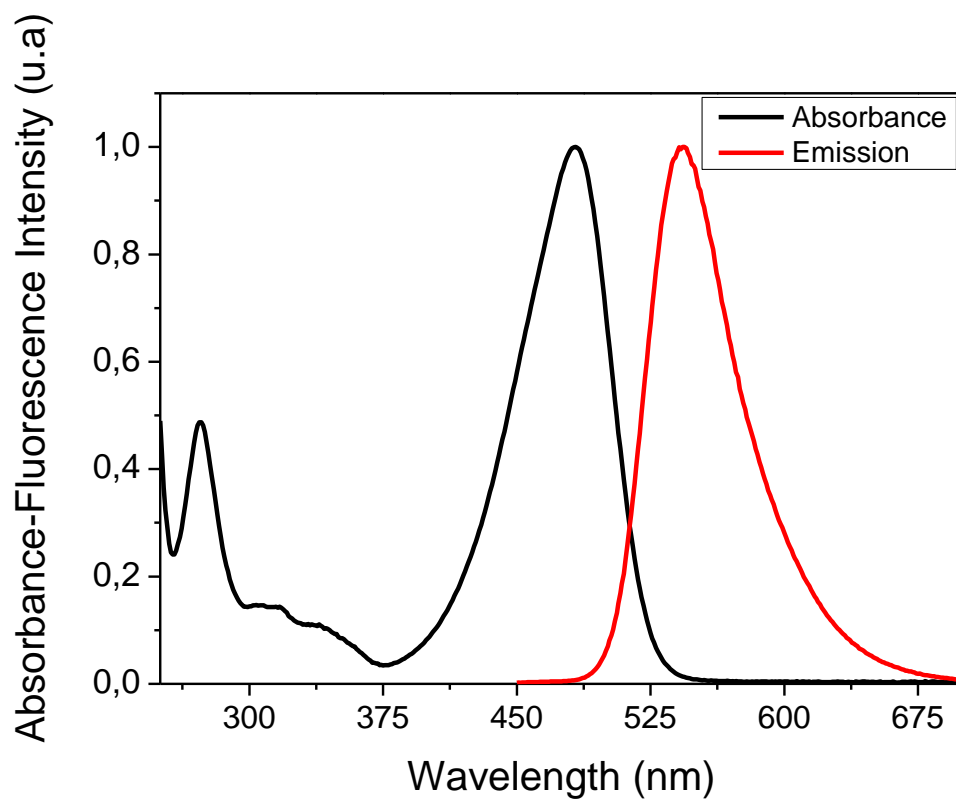

**Figure S8.** UV-Vis and emission spectra of **3**.

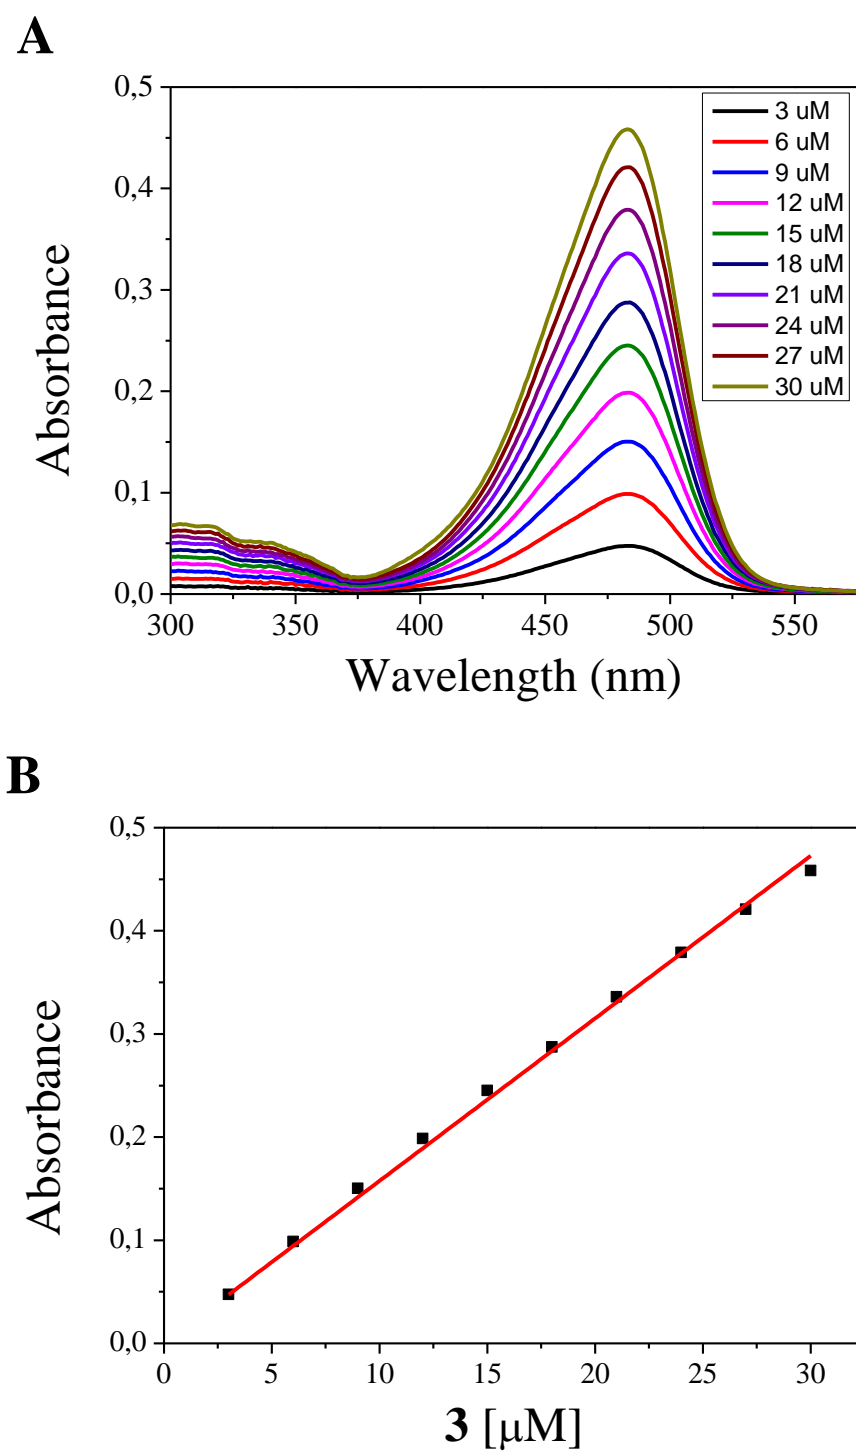

**Figure S9.** (A) UV-Vis spectra of **3** at different concentration; (B) Plot of absorbance of chemosensor **3** against its concentration from 3 to 30  $\mu\text{M}$ .

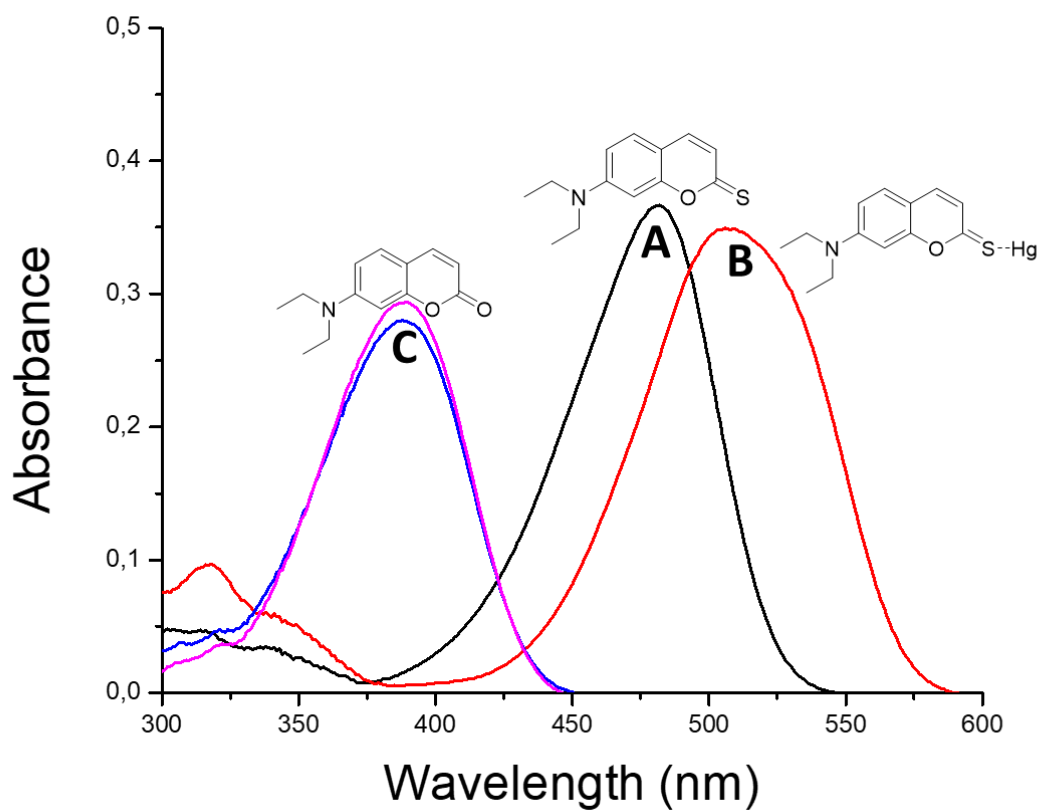

**Figure S10.** (A) UV-Vis spectra of **3**; (B) UV-Vis spectra of **3-Hg**; (C) UV-Vis spectra of **2**.

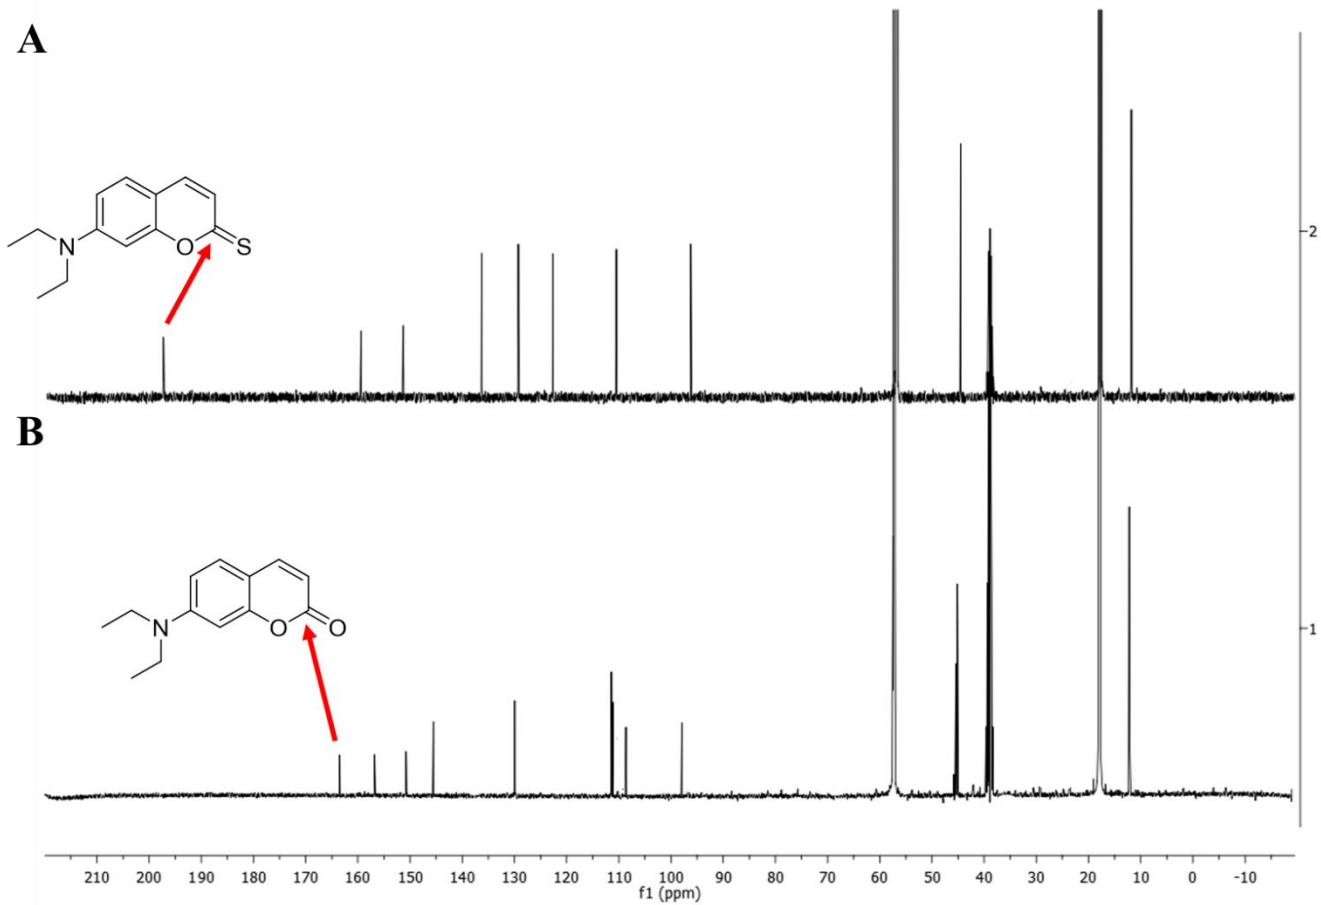

**Figure S11.**  $^{13}\text{C}$  NMR ( $\text{DMSO-}d_6$ ) spectrum of chemosensor 3 alone (A) and in the presence of mercuric ions (B).
